# Supplementary material
Source: PubMed Central journal article supplement (PMC8372836)
Supplement: NIHMS1726002-supplement-Suppl_data.pdf [file NIHMS1726002-supplement-Suppl_data.pdf]

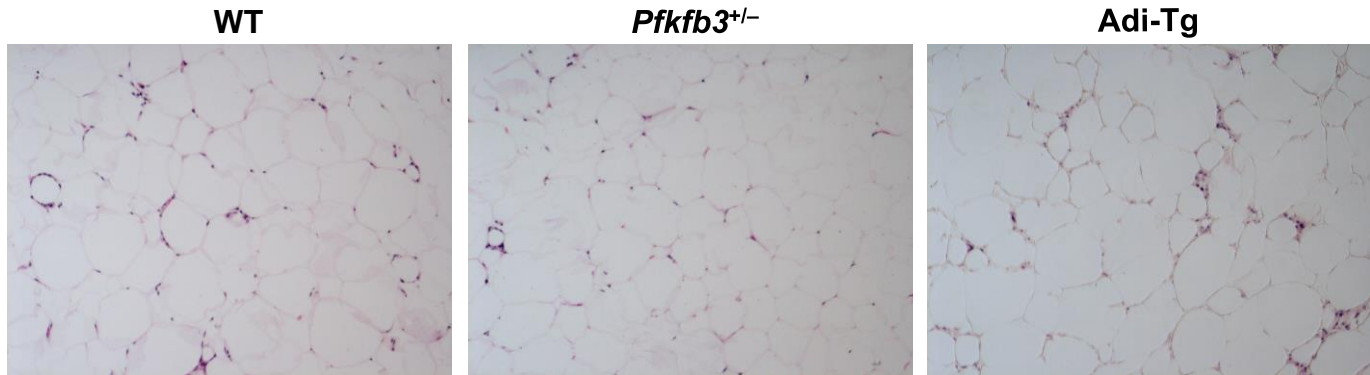

**Supplemental Figure S1. Related to Figure 2**  
**The iPfk2 in adipocytes determines adiposity**

White adipose tissue (WAT) histology of WT, *Pfkfb3*<sup>+/-</sup>, and Adi-Tg mice. At 5 - 6 weeks of age, the mice were fed a high-fat diet (HFD, 60% fat calories) for 12 weeks. WAT sections were stained with H&E. Similar data from the same sets of mice were published in J Biol Chem 2010,285:3713-3721 and J Biol Chem 2012,287:21492-21500.

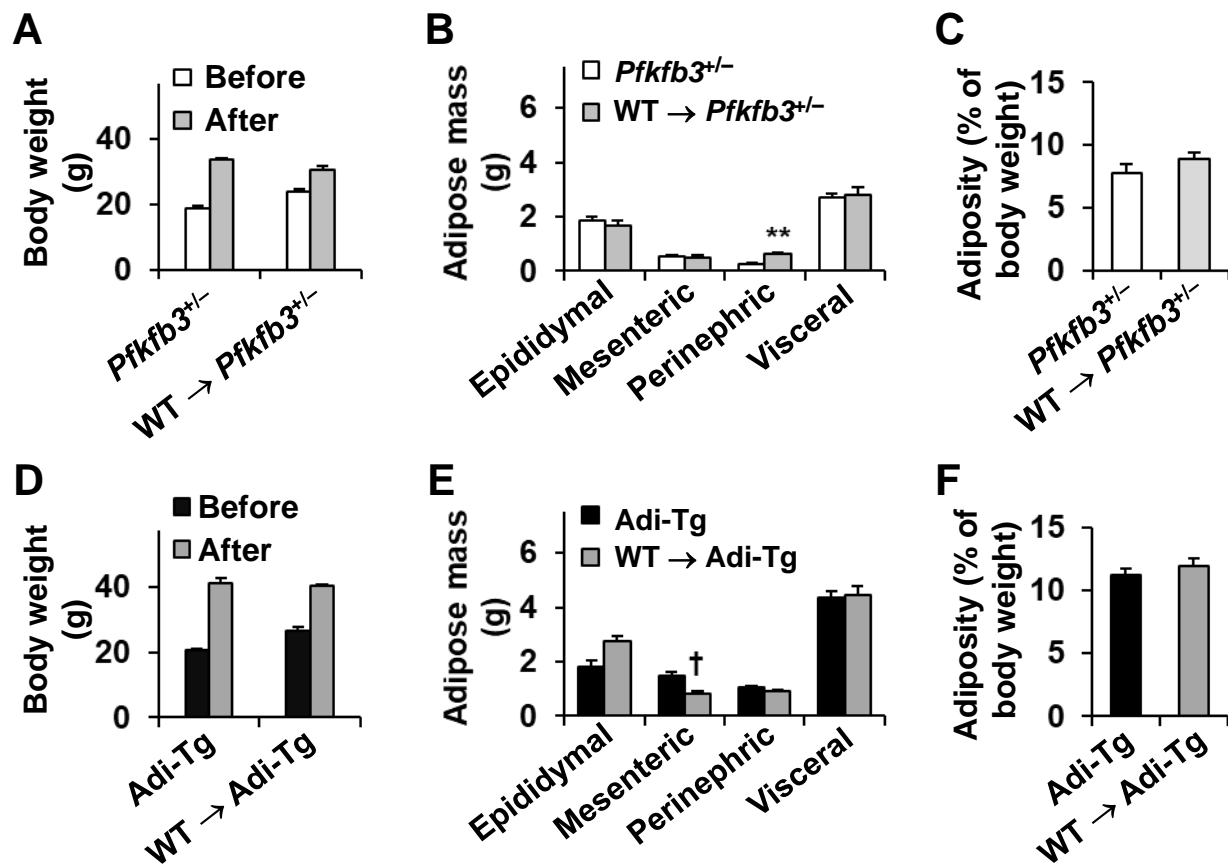

## Supplemental Figure S2. Related to Figure 2

### Adoptive transfer of wild-type hematopoietic cells does not alter adiposity

(A,B,C) Body weight (A), adipose tissue mass (B), and adiposity (C) of *Pfkfb3*-disrupted (*Pfkfb3*<sup>+/-</sup>) mice and WT → *Pfkfb3*<sup>+/-</sup> mice. (D,E,F) Body weight (D), adipose tissue mass (E), and adiposity (F) of Adi-Tg mice and WT → Adi-Tg mice. For A - F, male *Pfkfb3*<sup>+/-</sup> and Adi-Tg mice, at 5 - 6 weeks of age, were lethally irradiated and transferred with bone marrow cells from wild-type (WT) C57BL/6J mice. After recovery for 4 weeks from bone marrow transplantation, chimeric mice were fed a high-fat diet (HFD, 60% fat calories) for 12 weeks. In separate studies, male *Pfkfb3*<sup>+/-</sup> and Adi-Tg mice, at 5 - 6 weeks of age, were fed an HFD for 12 weeks. For A and D, body weight was recorded before and after HFD feeding. For B and E, after harvest of mice, the mass of epididymal, mesenteric, and perinephric fats were weighed and estimated as visceral fat mass. For C and F, adiposity was calculated as the ratio of visceral fat mass to body weight. For A and B, data are means ± SEM. n = 7 - 10. \*\*, *P* < 0.01 WT → *Pfkfb3*<sup>+/-</sup> vs. *Pfkfb3*<sup>+/-</sup> for the same type of fat mass; †, *P* < 0.05 WT → Adi-Tg vs. Adi-Tg for the same type of fat mass. Some of the original data for *Pfkfb3*<sup>+/-</sup> and Adi-Tg mice were published in J Biol Chem 2010,285:3713-3721 and J Biol Chem 2012,287:21492-21500.

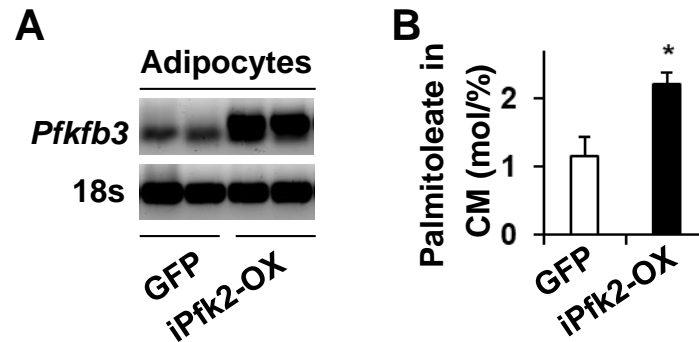

**Supplemental Figure S3. Related to Figure 4**

**Palmitoleate is a *Pfkfb3*-driven adipocyte bioactive lipid**

Palmitoleate production by adipocytes in response to *Pfkfb3* overexpression. Stable *Pfkfb3*-overexpressing 3T3-L1 (iPfk2-OX) were differentiated into adipocytes and examined for palmitoleate production. (A) Representative images of adipocyte *Pfkfb3* mRNAs. (B) Quantification of palmitoleate levels in adipocyte conditioned media (the original data were published in *J Biol Chem.* 2012 Jun 15;287(25):21492-500. doi: 10.1074/jbc.M112.370379).

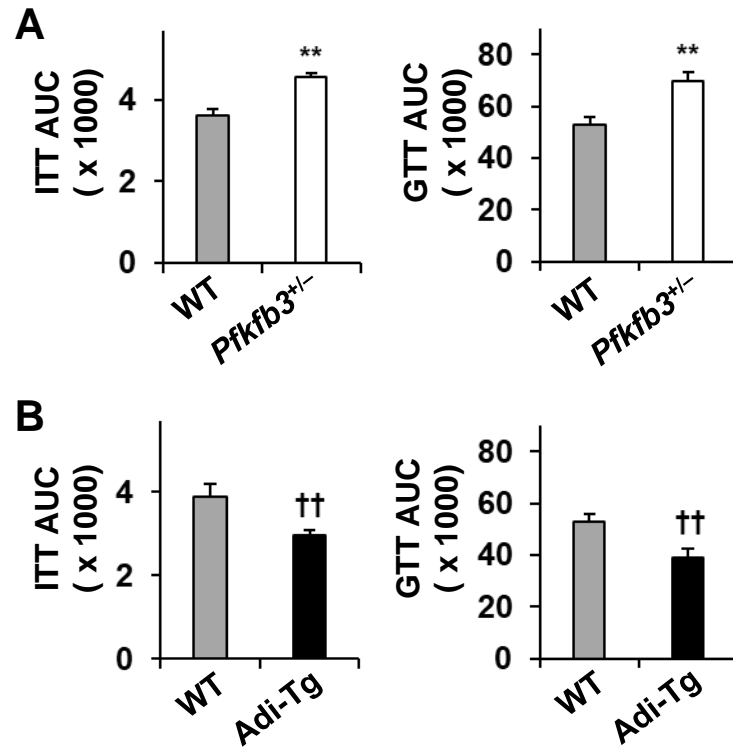

### Supplemental Figure S4. Related to Figure 5

#### *Pfkfb3*/*Pfk2* regulates systemic insulin sensitivity

(A,B) Area under curve (AUC) of insulin sensitivity and glucose tolerance tests in global *Pfkfb3*-disrupted (*Pfkfb3*<sup>+/-</sup>) mice (A) and aP2-*Pfkfb3* transgenic mice (*Adi-Tg*) mice (B). For A and B, male WT, *Pfkfb3*<sup>+/-</sup>, and *Adi-Tg* mice, at 5 - 6 weeks of age, were fed a high-fat diet (60% fat calories) for 12 weeks. After the feeding period, the mice were fasted for 4 hr and subjected to an intraperitoneal injection of insulin (1 U/kg body weight) or glucose (2 g/kg body weight). For A and B, data are means ± SEM. n = 10. \*,  $P < 0.05$  and \*\*,  $P < 0.01$  *Pfkfb3*<sup>+/-</sup> vs. WT; ††,  $P < 0.01$  *Adi-Tg* vs. WT. The original data for glucose and insulin tolerance tests were published in J Biol Chem 2010,285:3713-3721 and J Biol Chem 2012,287:21492-21500.

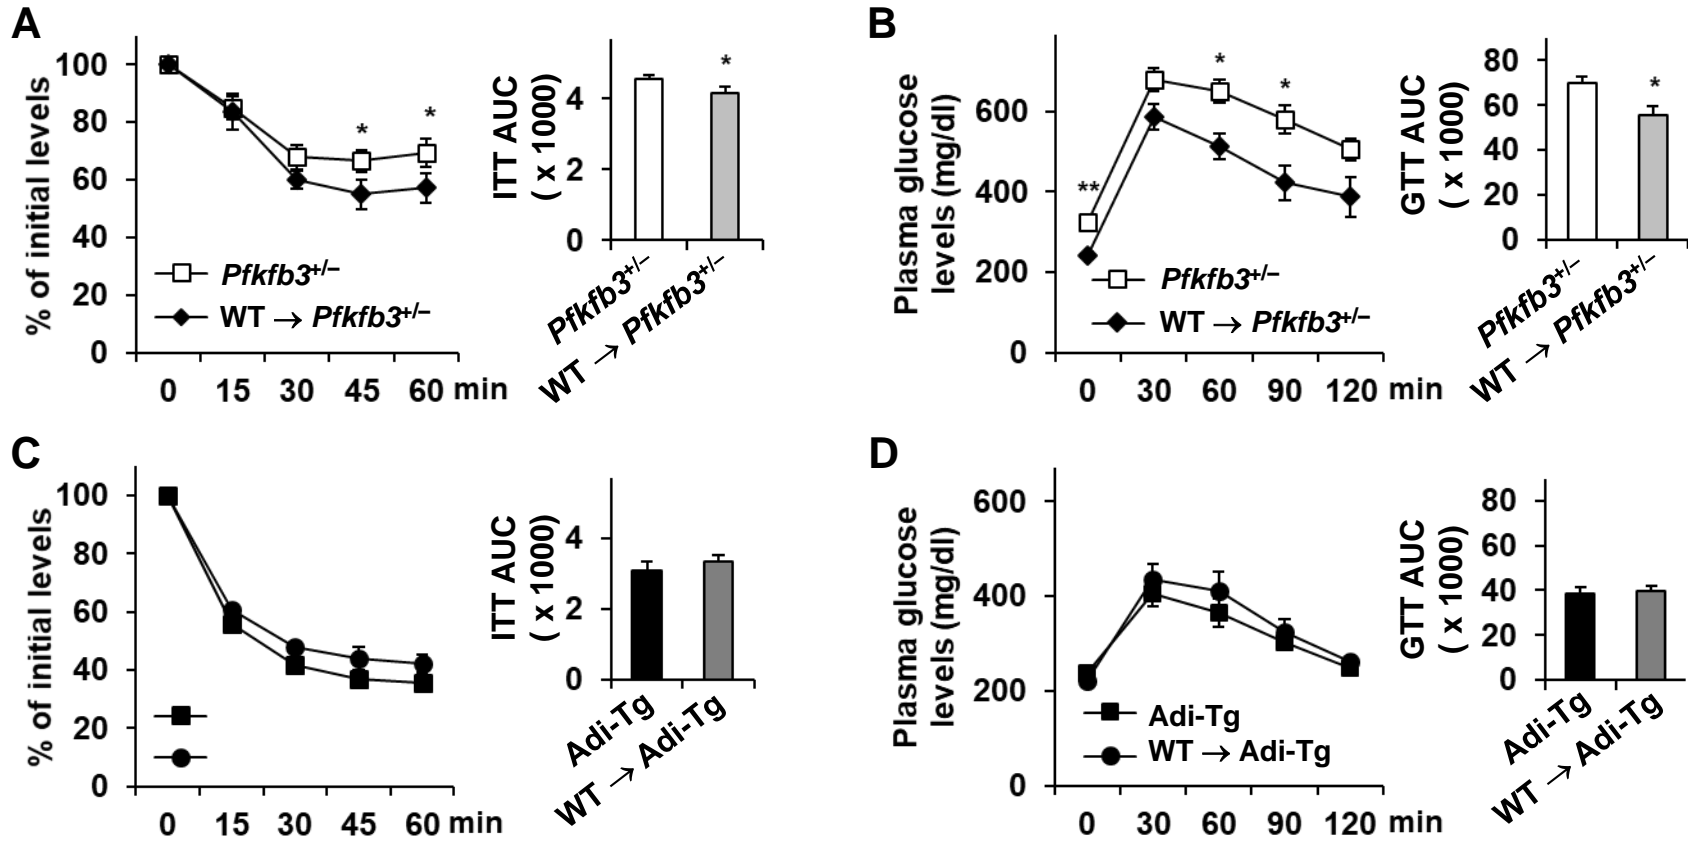

**Supplemental Figure S5. Related to Figure 5**

**Hematopoietic *Pfkfb3* regulates systemic insulin sensitivity and glucose tolerance**

Mice were as described in Figure S2. (A,B) Insulin (A) and glucose (B) tolerance tests for *Pfkfb3*-disrupted (*Pfkfb3*<sup>+/-</sup>) mice and WT → *Pfkfb3*<sup>+/-</sup> mice. (C,D) Insulin (C) and glucose (D) tolerance tests for Adi-Tg mice and WT → Adi-Tg mice. For A - D, after the feeding period, mice were fasted for 4 hr and received an intraperitoneal injection of insulin (1 U/kg body weight) (A and C) or glucose (2 g/kg body weight) (B and D). For A - D, data are means ± SEM. n = 7 - 10. \*, *P* < 0.05 WT → *Pfkfb3*<sup>+/-</sup> vs. *Pfkfb3*<sup>+/-</sup> in A and B (bar graphs) for the same point (line graphs).

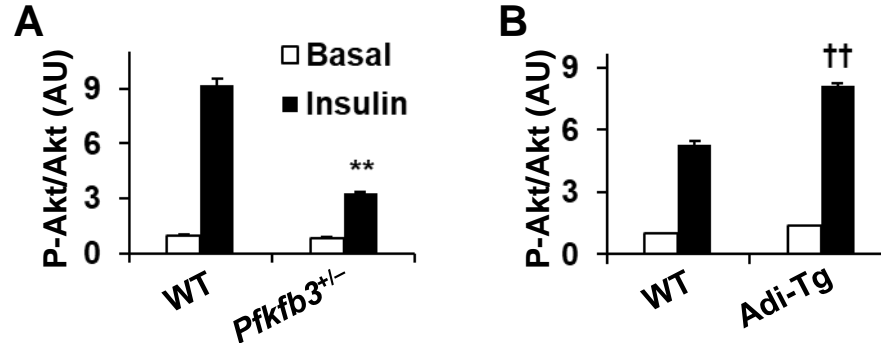

**Supplemental Figure S6. Related to Figure 6**  
***Pfkfb3*/*Pfk2* regulates WAT insulin signaling**

(A,B) Ratios of P-Akt/Akt in WAT from *Pfkfb3*<sup>+/-</sup> mice (A) and Adi-Tg mice (B) were quantified based on WAT insulin signaling (published in J Biol Chem 2010,285:3713-3721 and J Biol Chem 2012,287:21492-21500). At 5 - 6 weeks of age, male WT, *Pfkfb3*<sup>+/-</sup>, and Adi-Tg mice were fed a high-fat diet (60% fat calories) for 12 weeks. After the feeding period, some mice were fasted for 4 hr and given a bolus injection of insulin (1 U/kg body weight) into the portal vein for 5 min prior to harvest. WAT lysates were analyzed for the phosphorylation states of Akt and total amount of AKT. Data are means  $\pm$  SEM. n = 4 (without insulin) or 6 (with insulin). \*\*,  $P < 0.01$  *Pfkfb3*<sup>+/-</sup> vs. WT; ††,  $P < 0.01$  Adi-Tg vs. WT.
